# Supplementary material
Source: PubMed Central journal article supplement (PMC9436638)
Supplement: NIHMS1831806-supplement-Supp.pdf [file NIHMS1831806-supplement-Supp.pdf]

## **Supplementary Material**

Clinical Classification allows for a grouping of related ICD-9 codes and may be also related to the reason or reasons surrounding admission.

122 = Pneumonia, except caused by TBI or STIs

129 = Aspiration pneumonia

131 = Respiratory failure

2 = Septicemia

159 = Urinary Tract Infection

226 = Fracture of neck of femur (hip)

2603 = Falls

Comorbidity measures include entities that were likely present before admission.

CM\_DEPRESS = 1 = Depression

CM\_PSYCH = 1 = Psychoses

## **Reference**

Elixhauser A, Steiner C, Palmer L. Clinical Classifications Software (CCS), 2015. U.S. Agency for Healthcare Research and Quality. Available: <http://www.hcup-us.ahrq.gov/toolssoftware/ccs/ccs.jsp>
